# Supplementary material for: The Dorsolateral Prefrontal Cortex Plays a Role in Self-Initiated Elaborative Cognitive Processing during Episodic Memory Encoding: rTMS Evidence
Source: PLoS One. 2013 Sep 5;8(9):e73789. doi: 10.1371/journal.pone.0073789 (PMC3764025; doi:10.1371/journal.pone.0073789)
Supplement: Table S2 — Individual participant’s ques recall porportion of correct responses. Participant excluded rom the analysis due to poor performance are highlighted in blue. TMS order indicates if the fisrt block of the experiment was DLPFC or vertex stimulation. (XLSX) [file pone.0073789.s002.xlsx]

## Sheet: recall
TMS block		DLPFC				VERTEX
Condition		Self-Related	Cued-Related	Self-Unrelated	Cued-Unrelated	Self-Related	Cued-Related	Self-Unrelated	Cued-Unrelated		TMS order
	pt1	0.3333	0.3889	0.0556	0.2222	0.1111	0.2778	0.1111	0		vertex first
	pt2	0.7222	0.5	0.1111	0.1111	0.3889	0.3333	0.1111	0.1667		DLPFC first
excluded	pt3	0	0.1667	0	0	0.1667	0.2222	0	0		vertex first
	pt4	0.2778	0.4444	0	0.0556	0.1111	0.3889	0.0556	0		DLPFC first
	pt5	0.4444	0.4444	0.1111	0.1111	0.1111	0.5556	0.1667	0		vertex first
	pt6	0.2778	0.3333	0	0.2222	0.2222	0.3889	0	0.0556		DLPFC first
	pt7	0.3333	0.3889	0.0556	0	0.5	0.4444	0	0.0556		vertex first
	pt8	0.5556	0.3889	0.1667	0.0556	0.6667	0.7778	0.2222	0		DLPFC first
	pt9	0.3889	0.3333	0.0556	0	0.6667	0	0.0556	0		vertex first
	pt10	0.1111	0.4444	0.0556	0.0556	0.0556	0.3333	0	0		DLPFC first
	pt11	0.6111	0.5	0	0.1111	0.2778	0.5556	0.3333	0.0556		vertex first
	pt12	0.3333	0.6111	0.1667	0.1667	0.1667	0.3889	0	0.1111		DLPFC first
	pt13	0.6111	0.7778	0.6667	0.5	0.6111	0.7222	0.3889	0.3889		vertex first
ecluded	pt14	0	0.0556	0.0556	0	0.0556	0.1111	0	0		DLPFC first
	pt15	0.3333	0.3889	0.0556	0.0556	0.3889	0.3333	0	0.1111		vertex first
	pt16	0	0.2222	0	0	0.4444	0.4444	0.0556	0		DLPFC first
	pt17	0.1111	0.2222	0	0.1111	0.2778	0.1111	0.1111	0		vertex first
	pt18	0.3889	0.3333	0.0556	0.0556	0.6667	0.4444	0	0.2222		DLPFC first
	pt19	0.2778	0.1667	0.3333	0.0556	0.5	0.4444	0.2222	0		vertex first
excluded	pt20	0.1111	0.1667	0	0	0.1111	0.1111	0	0		DLPFC first
	pt21	0.3889	0.2222	0.4444	0.1111	0.5	0.4444	0.2778	0.2222		vertex first
	pt22	0	0.2222	0.1111	0	0.3889	0.2222	0.1111	0.0556		DLPFC first
	pt23	0.0556	0.5	0	0.0556	0.0556	0.3333	0	0.0556		vertex first
	pt24	0.5	0.5	0	0.0556	0.3333	0.5556	0.0556	0		DLPFC first
	pt25	0.2222	0.5	0	0.0556	0.0556	0.6667	0.1111	0.0556		vertex first
	pt26	0.5556	0.6111	0.5	0.4444	0.7222	0.5556	0.6111	0.6111		DLPFC first
	pt27	0.1111	0.3333	0	0.0556	0.2778	0.4444	0.0556	0.0556		vertex first
	pt28	0.1111	0.3333	0.0556	0.1111	0.1111	0.2222	0.1667	0		DLPFC first
excluded	pt29	0	0	0	0	0.0556	0.2222	0	0.0556		vertex first
	pt30	0.3333	0.2222	0.1667	0	0.2778	0.5556	0.1111	0		DLPFC first
	pt31	0.2778	0.6667	0	0.1111	0.2778	0.2778	0	0		vertex first
	pt32	0.3333	0.4444	0.0556	0.0556	0.1111	0.6111	0	0.0556		DLPFC first
	pt33	0.5556	0.2222	0.2778	0.3889	0.2778	0.3333	0.0556	0.1111		vertex first
	pt34	0.3333	0.1111	0.2222	0	0.6111	0.2222	0.4444	0		DLPFC first
	pt35	0.4444	0.3889	0.0556	0	0.6111	0.3333	0.1667	0		vertex first
	pt36	0.6111	0.5556	0.2778	0.0556	0.5	0.4444	0.1111	0		DLPFC first
	pt37	0.5556	0.6111	0	0	0.3333	0.4444	0.1111	0.0556		vertex first
	pt38	0.3333	0.5556	0.1111	0	0.4444	0.6667	0.2222	0.0556		DLPFC first
withdrew	pt39
	pt40	0.1667	0.1667	0.0556	0	0.3333	0.5	0.2778	0		DLPFC first
